# Supplementary material for: The first non Clostridial botulinum-like toxin cleaves VAMP within the juxtamembrane domain
Source: PubMed Central journal article supplement (PMC4957215; doi:10.1038/srep30257), 2016-07-22
Supplement: srep30257-s1.pdf [file srep30257-s1.pdf]

# The first non Clostridial botulinum-like toxin cleaves VAMP within the juxtamembrane domain

Irene Zornetta<sup>1,\*</sup>, Domenico Azarnia Tehran<sup>1,\*</sup>, Giorgio Arrigoni<sup>1,2,\*</sup>, Fabrizio Anniballi<sup>3</sup>, Luca Bano<sup>4</sup>, Oneda Leka<sup>1</sup>, Giuseppe Zanotti<sup>1</sup>, Thomas Binz<sup>5</sup> and Cesare Montecucco<sup>1</sup>

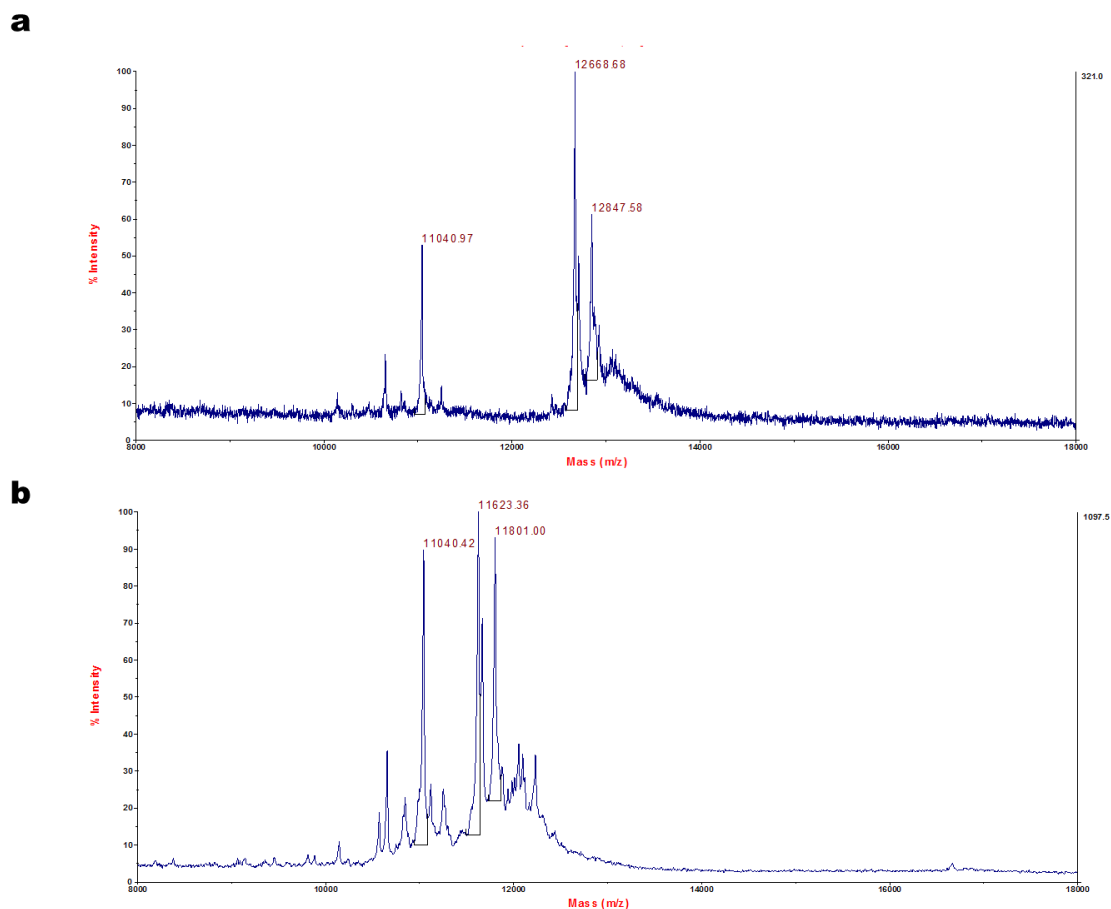

**Figure S1. MS spectra of rVAMP2 incubated with Wo-ORF1-LC.** MS spectra of rVAMP2 (1-97) acquired in linear mode in the presence (panel a) or absence (panel b) of EDTA. The intact segment 1-97 (m/z 12668.7 Da, panel a) is cleaved by Wo-ORF1-LC with a consequent mass shift at 11623.4 Da (panel b; mass difference of 1045.4 Da). The newly generated peptide (Fig. 4a) was identified with m/z= 1063.69 Da, equivalent to the enzymatic addition of a water molecule to the 1045.4 Da fragment. The peptide sequence was identified by MS/MS as shown in Fig. 4b. The MS spectra analysis was performed twice and representative spectra are shown.

**a**

|                       |     |            |                              |             |             |      |     |
|-----------------------|-----|------------|------------------------------|-------------|-------------|------|-----|
| SP O02495 SYB1_CAEEL  | 65  | GASQFEKSAA | TLKRKY <b>WW</b> KN          | IKMMIIMCAI  | VVILIIIIIVL | WAG  | 107 |
| SP Q54NW7 VAM7A_DICDI | 168 | ESFVFKSNSV | ALKRKL <b>W</b> QN           | KKLAIAIGLV  | VCILIAVITL  | ALLK | 210 |
| SP Q86AQ7 VAM7B_DICDI | 168 | QSFKFKQSK  | QLKCAM <b>W</b> WKN          | VKLMLVLGAI  | VLIIIFIIVM  | SYC  | 210 |
| SP O49377 VA711_ARATH | 168 | NTFRFRKQAR | RFRSNV <b>W</b> WRN          | CKLTVLLILL  | LLVIIYIAVA  | FLC  | 210 |
| SP Q9SIQ9 VA712_ARATH | 168 | NTFRFRKQTR | RFNNTV <b>W</b> WRN          | CKLTLILLIV  | LLVIIYIGVA  | FAC  | 210 |
| SP Q9LFP1 VA713_ARATH | 168 | NTFRFRKQAR | RYRTIM <b>W</b> WRN          | VKLTIALILV  | LALVVYIAMA  | FVC  | 211 |
| SP Q63666 VAMP1_RAT   | 75  | GASVFESSAA | KLKRKY <b>W</b> WKN          | CKMMIMLGAI  | CAIIVVVIVI  | YI   | 116 |
| SP P63045 VAMP2_RAT   | 73  | GASQFETSAA | KLKRKY <b>W</b> WKN          | LKMMIILGVI  | CAIILIIIV   | YF   | 114 |
| SP P63025 VAMP3_RAT   | 60  | GASQFETSAA | KLKRKY <b>W</b> WKN          | CKMWAIGISV  | LVIIIVIIIV  | WCV  | 102 |
| SP Q9WUF4 VAMP8_RAT   | 53  | TSEHFKTTSQ | KVARK <b>F</b> W <b>W</b> KN | VKMIVIIICVI | VLIIILIIIL  | FAT  | 95  |
| TR A0A0J9RNB2_DROSI   | 83  | GASQFEQQAG | KLKRK <b>F</b> W <b>L</b> QN | LKMMIIMGVI  | GLVVVGIIA   |      | 121 |
| SP P18489 SYB_DROME   | 89  | GASQFEQQAG | KLKRK <b>Q</b> W <b>W</b> AN | MKMMIILGVI  | AVVLLIIVLVS |      | 130 |

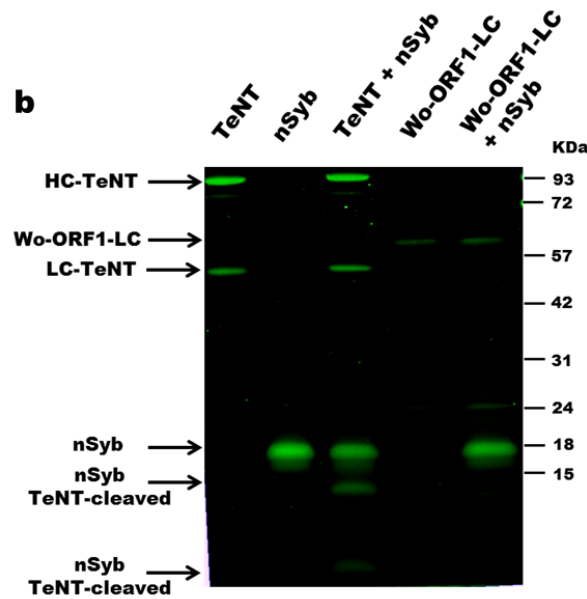

**Figure S2. Alignment of the C-terminal part of VAMPs of different organisms and *in vitro* nSyb proteolytic cleavage.** For the alignment in (a), we selected the region proximal to the transmembrane, indicated in grey. CAEEL indicates *C. elegans*, DICDI *D. discoideum*, ARATH *A. thaliana*, RAT *R. norvegicus*, DROSI, *D. simulans* and DROME, *D. melanogaster*. (b) 1  $\mu$ g of nSyb was incubated with 1  $\mu$ g of Wo-ORF1-LC in 50 mM NaHPO<sub>4</sub> buffer supplemented with 0.1% octylglucoside, pH 7.4 for 4 hours at 37°C under stirring. SDS-PAGE gel was stained with SimplyBlue™ SafeStain and it was imaged on Odyssey® LI-COR, more sensitive than white-light imaging of Coomassie staining<sup>1</sup>. This image is representative of two independent experiments.

## References

- 1 Luo, S., Wehr, N. B. & Levine, R. L. Quantitation of protein on gels and blots by infrared fluorescence of Coomassie blue and Fast Green. *Anal Biochem* **350**, 233-238 (2006).
